# Supplementary material for: Menstrual characteristics, menstrual anxiety and school attendance among adolescents in Uganda: a longitudinal study
Source: Springer Nature journal article supplement (doi:10.1186/s12905-021-01544-6), 2021-12-01
Supplement: MOESM1 [file 19950818]

Supplementary file 1: Measures used in the analysis of factors associated with feeling anxious about the next period (objective 1) and how these relate to the model (Figure 2)

| LEVEL                              | Variable                                                          | Definition of measure used in analysis                                                                                                                                                          | How the variable was measured                                                                                                                                                                                                                                                                                                                                                                                                                                                                                                                                                                                                                             |
|------------------------------------|-------------------------------------------------------------------|-------------------------------------------------------------------------------------------------------------------------------------------------------------------------------------------------|-----------------------------------------------------------------------------------------------------------------------------------------------------------------------------------------------------------------------------------------------------------------------------------------------------------------------------------------------------------------------------------------------------------------------------------------------------------------------------------------------------------------------------------------------------------------------------------------------------------------------------------------------------------|
| <b>Baseline survey</b>             |                                                                   |                                                                                                                                                                                                 |                                                                                                                                                                                                                                                                                                                                                                                                                                                                                                                                                                                                                                                           |
| <b>1: Resource limitations</b>     | Socio-economic status                                             | Positive responses were added to give a total of 0-9. A binary variable was then created splitting the sample into approximately half.<br>Higher SES – score of 3-9<br>Lower SES – score of 0-2 | Participants were asked whether their household had each of the following items: <ul style="list-style-type: none"> <li>- Electricity</li> <li>- Running water inside house</li> <li>- Refrigerator</li> <li>- TV</li> <li>- More than 10 chickens or other birds</li> <li>- Cows, goats, sheep, rabbits or pigs</li> <li>- Moving motorbike</li> <li>- Moving car</li> <li>- Land for farming</li> </ul>                                                                                                                                                                                                                                                 |
| <b>2: Behavioural expectations</b> | It is healthy for a girl to run, dance or cycle during her period | Binary variable created: <ol style="list-style-type: none"> <li>1. Strongly agrees/agrees</li> <li>2. Neither agrees or disagrees/disagrees/strongly disagrees</li> </ol>                       | Participants were asked to what extent they agreed with the statement with response options:<br>Strongly agree, Agree, Neither agree nor disagree, Disagree or Strongly disagree                                                                                                                                                                                                                                                                                                                                                                                                                                                                          |
| <b>2: Menstrual knowledge</b>      | No. menstruation biology questions correct                        | Correct responses were summed to give a total score ranging from 0-9                                                                                                                            | Participants were asked whether each of the following statements were true or false: <ul style="list-style-type: none"> <li>- Adolescence is the time between puberty and adulthood.</li> <li>- Changes in the body during puberty happen because of hormones.</li> <li>- The physical changes related to puberty usually start between 10 and 14 years of age in girls, and between 12 and 16 in boys.</li> <li>- Menstrual blood comes from the stomach where food is digested.</li> <li>- Women stop menstruating after the age of about 45–50.</li> <li>- Menstruation in girls and women is normal.</li> <li>- Pregnant women menstruate.</li> </ul> |

|                                             |                                                                                                                                                                                                       |  |                                                                                                                                                                                                                                                                                                                                                                                                                                                                                                                                                                                                                   |
|---------------------------------------------|-------------------------------------------------------------------------------------------------------------------------------------------------------------------------------------------------------|--|-------------------------------------------------------------------------------------------------------------------------------------------------------------------------------------------------------------------------------------------------------------------------------------------------------------------------------------------------------------------------------------------------------------------------------------------------------------------------------------------------------------------------------------------------------------------------------------------------------------------|
|                                             |                                                                                                                                                                                                       |  | <ul style="list-style-type: none"> <li>- When a girl gets her first period, her body is ready to have children.</li> <li>- During her period a girl can get pregnant.</li> </ul>                                                                                                                                                                                                                                                                                                                                                                                                                                  |
| No. menstrual cycle questions correct       | Correct responses summed to give a total score ranging from 0-3.                                                                                                                                      |  | <p>Participants were asked each of the following questions with closed responses:</p> <ul style="list-style-type: none"> <li>- What is period blood?</li> <li>- How long does a period usually last?</li> <li>- How many days are there usually between periods?</li> </ul>                                                                                                                                                                                                                                                                                                                                       |
| No. effective pain management methods known | <p>Correct responses are shown in bold.<br/> Correct responses were summed and a categorical variable was created based on whether girls knew:</p> <p>0/1 method<br/> 2/3 methods<br/> 4+ methods</p> |  | <p>Participants were asked:<br/> What are effective ways of managing period pains? Response options (select all that apply) were:</p> <ul style="list-style-type: none"> <li>- Nothing</li> <li>- <b>Painkillers</b></li> <li>- <b>Drinking lots of clean water</b></li> <li>- <b>Holding a warm water bottle on the stomach</b></li> <li>- <b>Exercise and stretching</b></li> <li>- <b>Relaxing</b></li> <li>- <b>Eating foods with lots of water, like watermelon</b></li> <li>- Drinking soda</li> <li>- Eating spicy foods</li> <li>- Taking antibiotics</li> <li>- I don't know</li> <li>- Other</li> </ul> |
| Painkillers cause problems having children  | <p>Binary variable created:</p> <ol style="list-style-type: none"> <li>1. Strongly disagrees/disagrees</li> <li>2. Neither agrees or disagrees/agrees/strongly agrees</li> </ol>                      |  | <p>Participants were asked to what extent they agreed with the statement with response options:<br/> Strongly agree, Agree, Neither agree nor disagree, Disagree or Strongly disagree</p>                                                                                                                                                                                                                                                                                                                                                                                                                         |
| When a girl has per period she is unclean   | <p>Binary variable created:</p> <ol style="list-style-type: none"> <li>1. Strongly disagrees/disagrees</li> <li>2. Neither agrees or disagrees/agrees/strongly agrees</li> </ol>                      |  | <p>Participants were asked to what extent they agreed with the statement with response options:<br/> Strongly agree, Agree, Neither agree nor disagree, Disagree or Strongly disagree</p>                                                                                                                                                                                                                                                                                                                                                                                                                         |

|                                        |                                                         |                                                                                                                                      |                                                                                                                                                                                                                                                                                                                                                                                                                                                                                                                                                                                                                            |
|----------------------------------------|---------------------------------------------------------|--------------------------------------------------------------------------------------------------------------------------------------|----------------------------------------------------------------------------------------------------------------------------------------------------------------------------------------------------------------------------------------------------------------------------------------------------------------------------------------------------------------------------------------------------------------------------------------------------------------------------------------------------------------------------------------------------------------------------------------------------------------------------|
|                                        | Sanitary pads can cause sickness or infection           | Binary variable created:<br>1. Strongly disagrees/disagrees<br>2. Neither agrees or disagrees/agrees/strongly agrees                 | Participants were asked to what extent they agreed with the statement with response options:<br>Strongly agree, Agree, Neither agree nor disagree, Disagree or Strongly disagree                                                                                                                                                                                                                                                                                                                                                                                                                                           |
| <b>3: Menstrual practices</b>          | Only used manufactured methods at last menstrual period | Manufactured methods are shown in bold. Those only reporting using these methods were a yes for this variable, all others were a no. | Participants were asked:<br>Which of the following did you use during your most recent period?<br>Response options (select all that apply) were:<br><ul style="list-style-type: none"> <li>- <b>Afripads or other re-usable pad</b></li> <li>- <b>Always or other pad you can throw away</b></li> <li>- <b>Ruby Cup or other menstrual cup</b></li> <li>- Old clothes</li> <li>- Toilet paper</li> <li>- Cotton wool</li> <li>- Knickers only</li> <li>- Locally made pads you throw away e.g. made of banana fibres or other local materials</li> <li>- <b>Tampons</b></li> <li>- New clothes</li> <li>- Other</li> </ul> |
| <b>3: Individual menstrual factors</b> | Blood leaked through clothes in last menstrual period   | Binary variable.                                                                                                                     | Participants were asked:<br>Did blood leak through your clothes during your most recent period?<br>Yes<br>No                                                                                                                                                                                                                                                                                                                                                                                                                                                                                                               |
| <b>3: Menstrual confidence</b>         | Pain during last menstrual period                       | Binary variable.                                                                                                                     | Participants were asked:<br>Did you have any pain during your last period?<br>Yes<br>No                                                                                                                                                                                                                                                                                                                                                                                                                                                                                                                                    |
|                                        | During my period I feel less self-confident             | Binary variable created:<br>1. Strongly disagrees/disagrees                                                                          | Participants were asked to what extent they agreed with the statement with response options:<br>Strongly agree, Agree, Neither agree nor disagree, Disagree or Strongly disagree                                                                                                                                                                                                                                                                                                                                                                                                                                           |

|                                                                                    |                                                                                                                      |                                                                                                                                                                                  |
|------------------------------------------------------------------------------------|----------------------------------------------------------------------------------------------------------------------|----------------------------------------------------------------------------------------------------------------------------------------------------------------------------------|
| than during other days.                                                            | 2. Neither agrees or disagrees/agrees/strongly agrees                                                                |                                                                                                                                                                                  |
| During my period I avoid physical activity (eg, walking, running).                 | Binary variable created:<br>1. Strongly disagrees/disagrees<br>2. Neither agrees or disagrees/agrees/strongly agrees | Participants were asked to what extent they agreed with the statement with response options:<br>Strongly agree, Agree, Neither agree nor disagree, Disagree or Strongly disagree |
| I prefer staying at home during my period rather than going to school.             | Binary variable created:<br>1. Strongly disagrees/disagrees<br>2. Neither agrees or disagrees/agrees/strongly agrees | Participants were asked to what extent they agreed with the statement with response options:<br>Strongly agree, Agree, Neither agree nor disagree, Disagree or Strongly disagree |
| I worry about being teased during my period.                                       | Binary variable created:<br>1. Strongly disagrees/disagrees<br>2. Neither agrees or disagrees/agrees/strongly agrees | Participants were asked to what extent they agreed with the statement with response options:<br>Strongly agree, Agree, Neither agree nor disagree, Disagree or Strongly disagree |
| I feel comfortable to talk to other girls at school about my period.               | Binary variable created:<br>1. Strongly agrees/agrees<br>2. Neither agrees or disagrees/disagrees/strongly disagrees | Participants were asked to what extent they agreed with the statement with response options:<br>Strongly agree, Agree, Neither agree nor disagree, Disagree or Strongly disagree |
| If I had a problem with managing my period, I would talk to another girl about it. | Binary variable created:<br>1. Strongly agrees/agrees<br>2. Neither agrees or disagrees/disagrees/strongly disagrees | Participants were asked to what extent they agreed with the statement with response options:<br>Strongly agree, Agree, Neither agree nor disagree, Disagree or Strongly disagree |

|                                        |                                             |                                                                                                                                                                                                                            |                                                                                                                                                                                                                                                                       |
|----------------------------------------|---------------------------------------------|----------------------------------------------------------------------------------------------------------------------------------------------------------------------------------------------------------------------------|-----------------------------------------------------------------------------------------------------------------------------------------------------------------------------------------------------------------------------------------------------------------------|
|                                        | Boys/girls tease me about my period         | Binary variable created: <ul style="list-style-type: none"> <li>1. Strongly disagrees/disagrees with both statements</li> <li>2. Neither agrees or disagrees/agrees/strongly agrees with one or more statements</li> </ul> | Participants were asked to what extent they agreed with the following two statements:<br>Boys tease me about my period<br>Girls tease me about my period<br><br>Response options:<br>Strongly agree, Agree, Neither agree nor disagree, Disagree or Strongly disagree |
| <b>3. Menstrual shame and distress</b> | I worry about being teased during my period | Binary variable created: <ul style="list-style-type: none"> <li>1. Strongly disagrees/disagrees</li> <li>2. Neither agrees or disagrees/agrees/strongly agrees</li> </ul>                                                  | Participants were asked to what extent they agreed with the statement with response options:<br>Strongly agree, Agree, Neither agree nor disagree, Disagree or Strongly disagree                                                                                      |
