# Supplementary material for: Menstrual characteristics, menstrual anxiety and school attendance among adolescents in Uganda: a longitudinal study
Source: Springer Nature journal article supplement (doi:10.1186/s12905-021-01544-6), 2021-12-01
Supplement: MOESM2 [file 19950818]

Supplementary file 2: Daily diary

|     |           | Did you go to school today? |                          |                          |                          | Did you attend class today? |                          |                          | Are you in your period today? |                          |                          | Do you have period pain today? |                          |                          |
|-----|-----------|-----------------------------|--------------------------|--------------------------|--------------------------|-----------------------------|--------------------------|--------------------------|-------------------------------|--------------------------|--------------------------|--------------------------------|--------------------------|--------------------------|
| Day | Date      | Full Day                    | Half Day                 | No                       | Holiday                  | Yes                         | Some                     | None                     | No                            | Light period             | Moderate period          | Heavy period                   | No                       | Yes                      |
| Mon | 31 Jul 17 | <input type="checkbox"/>    | <input type="checkbox"/> | <input type="checkbox"/> | <input type="checkbox"/> | <input type="checkbox"/>    | <input type="checkbox"/> | <input type="checkbox"/> | <input type="checkbox"/>      | <input type="checkbox"/> | <input type="checkbox"/> | <input type="checkbox"/>       | <input type="checkbox"/> | <input type="checkbox"/> |
| Tue | 01 Aug 17 | <input type="checkbox"/>    | <input type="checkbox"/> | <input type="checkbox"/> | <input type="checkbox"/> | <input type="checkbox"/>    | <input type="checkbox"/> | <input type="checkbox"/> | <input type="checkbox"/>      | <input type="checkbox"/> | <input type="checkbox"/> | <input type="checkbox"/>       | <input type="checkbox"/> | <input type="checkbox"/> |
| Wed | 02 Aug 17 | <input type="checkbox"/>    | <input type="checkbox"/> | <input type="checkbox"/> | <input type="checkbox"/> | <input type="checkbox"/>    | <input type="checkbox"/> | <input type="checkbox"/> | <input type="checkbox"/>      | <input type="checkbox"/> | <input type="checkbox"/> | <input type="checkbox"/>       | <input type="checkbox"/> | <input type="checkbox"/> |
| Thu | 03 Aug 17 | <input type="checkbox"/>    | <input type="checkbox"/> | <input type="checkbox"/> | <input type="checkbox"/> | <input type="checkbox"/>    | <input type="checkbox"/> | <input type="checkbox"/> | <input type="checkbox"/>      | <input type="checkbox"/> | <input type="checkbox"/> | <input type="checkbox"/>       | <input type="checkbox"/> | <input type="checkbox"/> |
| Fri | 04 Aug 17 | <input type="checkbox"/>    | <input type="checkbox"/> | <input type="checkbox"/> | <input type="checkbox"/> | <input type="checkbox"/>    | <input type="checkbox"/> | <input type="checkbox"/> | <input type="checkbox"/>      | <input type="checkbox"/> | <input type="checkbox"/> | <input type="checkbox"/>       | <input type="checkbox"/> | <input type="checkbox"/> |
| Sat | 05 Aug 17 | <input type="checkbox"/>    | <input type="checkbox"/> | <input type="checkbox"/> | <input type="checkbox"/> | <input type="checkbox"/>    | <input type="checkbox"/> | <input type="checkbox"/> | <input type="checkbox"/>      | <input type="checkbox"/> | <input type="checkbox"/> | <input type="checkbox"/>       | <input type="checkbox"/> | <input type="checkbox"/> |
| Sun | 06 Aug 17 | <input type="checkbox"/>    | <input type="checkbox"/> | <input type="checkbox"/> | <input type="checkbox"/> | <input type="checkbox"/>    | <input type="checkbox"/> | <input type="checkbox"/> | <input type="checkbox"/>      | <input type="checkbox"/> | <input type="checkbox"/> | <input type="checkbox"/>       | <input type="checkbox"/> | <input type="checkbox"/> |

**Footnotes:**

**Remember to tick one box per column on each day**

- Did you go to school today? Full day=Yes, for the whole day.  
Half day = Yes for half a day, No = Did not attend school although it was open, Holiday = Including public holidays and weekends when you do not study
- Did you attend class today? Yes = All classes, Some = some classes; None = No class attended
- Are you in your period today? No = I am not having my periods, Light period = light flow, Moderate period = average blood flow, Heavy period=heavy blood flow
- Do you have period pain today? Yes = your stomach or back aches due to period, No = your stomach or back not aching today due to period.
